# Supplementary material
Source: publisher figshare collection journal article supplement (https://karger.figshare.com/ndownloader/files/8710072)
Supplement: Supplementary file 1 [file 8710072]

**Appendix A: IAPS numbers selected pictures**

Test (Set A)

Training (set B)

Neutral

Trauma

Neutral

Trauma

1333

1419

1450

1540

1590

1603

1670

1810

2235

2514

2980

5010

5200

5390

5471

5500

5531

5534

5600

5621

5628

5629

5660

5700

5764

5780

7035

7037

7038

7052

7057

7090

7130

7140

7150

7161

7175

7185

7190

7205

7230

7233

7234

7490

7491

7547

7595

7950

2703

2799

3022

3181

3215

3500

3550.1

5970

6010

6021

6190

6210

6241

6243

6250

6313

6540

6821

6836

6840

6940

7361

9000

9010

9041

9050

9230

9250

9252

9402

9404

9419

9424

9425

9427

9429

9435

9470

9471

9495

9594

9611

9620

9630

9900

9902

9910

9912

1500

1600

1602

1604

1620

1740

1812

1910

1920

2191

2383

2745.1

5000

5020

5130

5201

5300

5510

5520

5530

5532

5535

5623

5626

5631

5635

5711

5720

5731

5750

5760

5800

5811

5870

5891

7002

7004

7006

7009

7010

7036

7041

7059

7080

7160

7179

7211

7260

2811

2900

3180

3210

3216

3225

3530

5972

6020

6022

6200

6211

6230

6242

6260

6311

6312

6314

6315

6350

6360

6370

6510

6530

6550

6560

6561

6562

6570

6571

6610

6800

6825

6830

6834

6838

9007

9160

9254

9421

9426

9428

9592

9622

9635.2

9901

9903

9911
